# Supplementary material
Source: bioRxiv or medRxiv preprint supplement (https://www.biorxiv.org/highwire/filestream/90500/field_highwire_adjunct_files/0/288704-1.pdf)
Supplement: Supplementary file [file 288704-1.pdf]

# Supporting information

**Supplemental Figure 1.** Total exposures by antibiotic, species, and condition, and proportion of bystander exposures over all conditions by antibiotic and species.

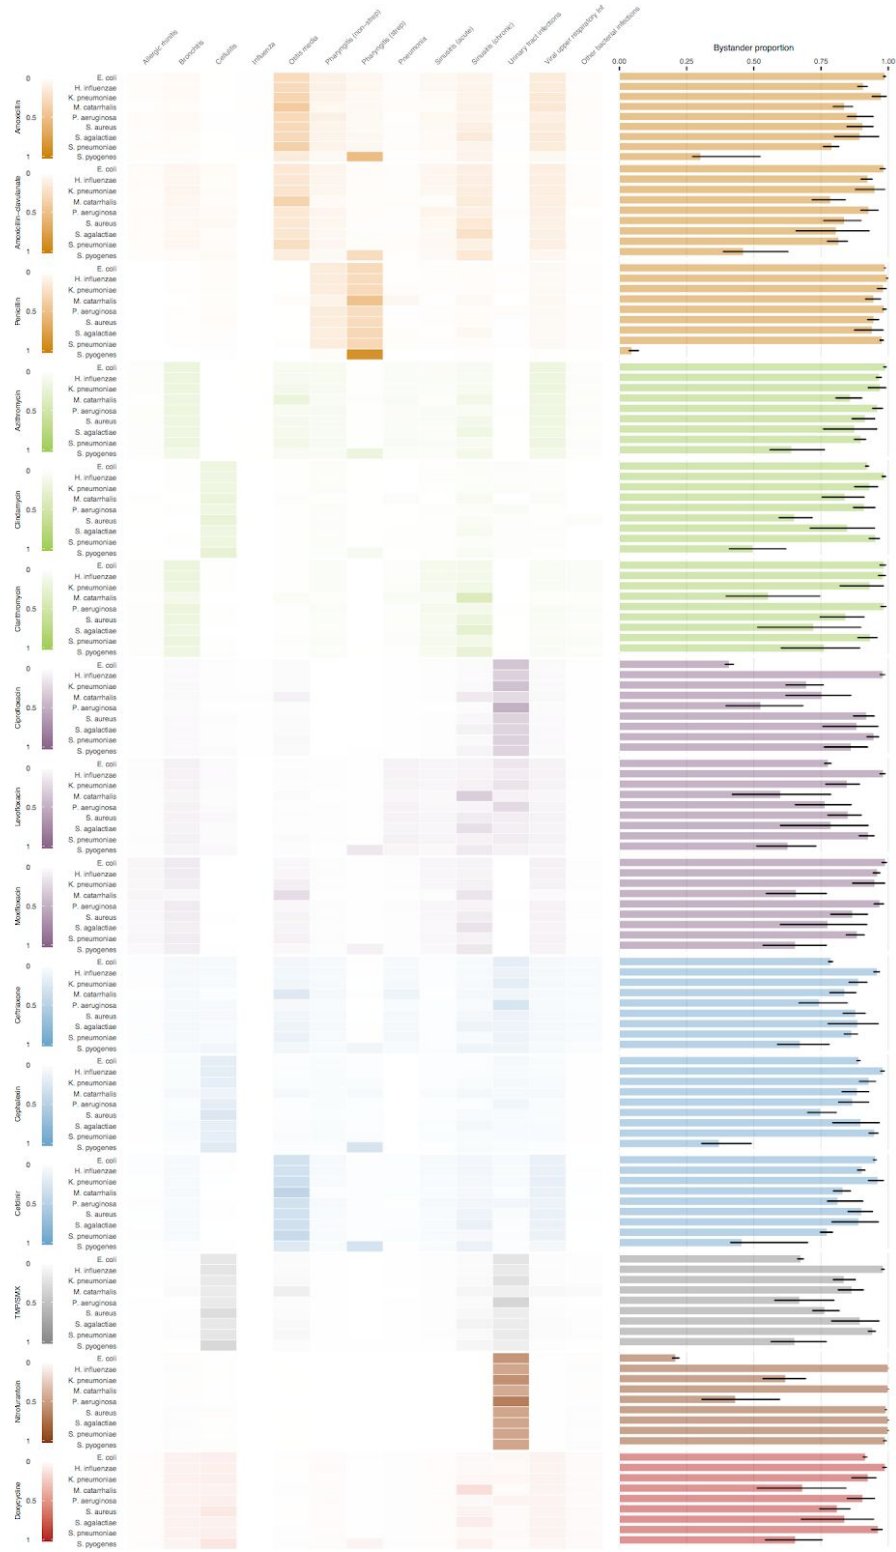

**Supplemental Figure 2.** Number of sampled outpatient visits (unweighted) from NAMCS/NHAMCS 2010-2011 with given diagnosis and antibiotic prescription.

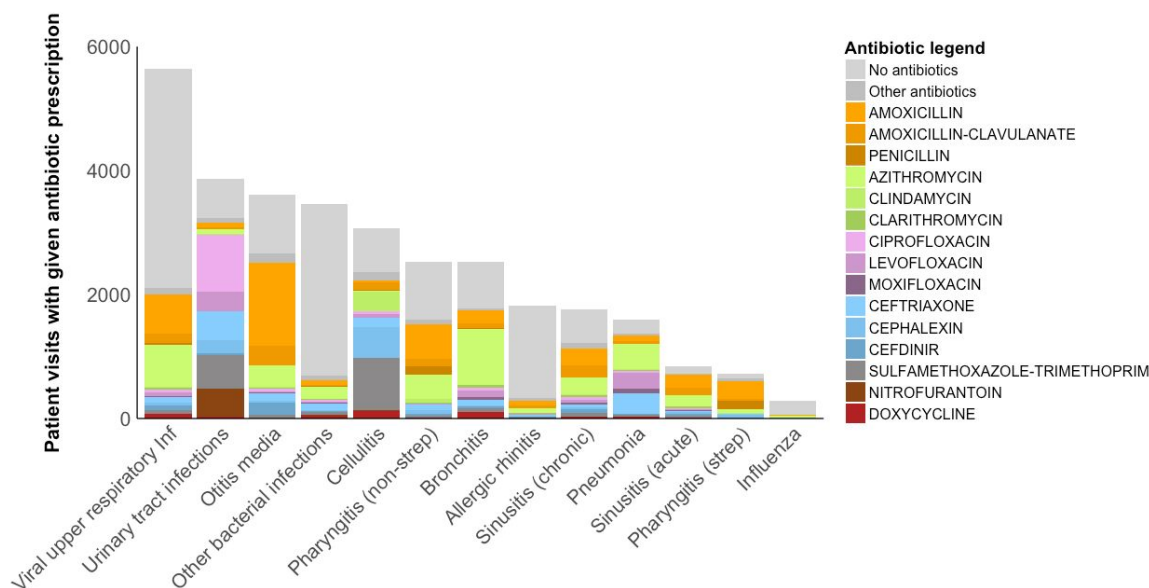

**Supplemental Table 1.** Carriage studies used to characterize microbial prevalences for which HMP data was unavailable. In addition to prevalences among children <5 years old, additional carriage studies were also used for *S. pyogenes* and *S. pneumoniae* in the >5-year-old age group as taxonomic profiling of HMP data via MetaPhlan2 does not distinguish between these and similar species. Specific studies were not identified for *P. aeruginosa* and *S. agalactiae* for children from 1 to 5 years old; the prevalences among children under 1 year old were imputed in these cases.

| Article                      | Age group                    | Body site               | Organisms                                                             |
|------------------------------|------------------------------|-------------------------|-----------------------------------------------------------------------|
| Bäckhed et al. 2015 (1)      | <1 year old                  | Gastrointestinal        | <i>P. aeruginosa</i><br><i>S. agalactiae</i>                          |
| Bogaert et al. 2011 (2)      | 1-5 years old                | Nasopharyngeal          | <i>H. influenzae</i>                                                  |
| Mainous et al. 2006 (3)      | 1-5 years old                | Nasopharyngeal          | <i>S. aureus</i>                                                      |
| Regev-Yochay et al. 2004 (4) | <1 year old<br>1-5 years old | Nasopharyngeal          | <i>S. aureus</i><br><i>S. pneumoniae</i>                              |
| Verhaegh et al. 2010 (5)     | <1 year old<br>1-5 years old | Nasopharyngeal          | <i>M. catarrhalis</i>                                                 |
| Pettigrew et al. 2012 (6)    | <1 year old<br>1-5 years old | Upper respiratory tract | <i>H. influenzae</i><br><i>M. catarrhalis</i><br><i>S. pneumoniae</i> |

|                                                |                              |                  |                                                                                                          |
|------------------------------------------------|------------------------------|------------------|----------------------------------------------------------------------------------------------------------|
| Holgerson et al. 2015 (7)                      | <1 year old<br>1-5 years old | Oral             | <i>E. coli</i><br><i>H. influenzae</i><br><i>K. pneumoniae</i><br><i>S. aureus</i><br><i>S. pyogenes</i> |
| Yassour et al. 2016 (8)<br>(DIABIMMUNE cohort) | <1 year old<br>1-5 years old | Gastrointestinal | <i>E. coli</i><br><i>H. influenzae</i><br><i>K. pneumoniae</i><br><i>S. aureus</i>                       |
| Ginsburg et al. 1985 (9)                       | All                          | Throat           | <i>S. pyogenes</i>                                                                                       |
| Gunnarsson et al. 1997 (10)                    | All                          | Throat           | <i>S. pyogenes</i>                                                                                       |
| Hammit et al. 2006 (11)                        | All                          | Nasopharyngeal   | <i>S. pneumoniae</i>                                                                                     |
| Huang et al. 2009 (12)                         | All                          | Nasopharyngeal   | <i>S. pneumoniae</i>                                                                                     |

**Supplemental Table 2.** Carriage prevalence estimates by age group and species from HMP and sources shown in Supplemental Table 1.

| Species               | <1 year old | 1-5 years old | >5 years old |
|-----------------------|-------------|---------------|--------------|
| <i>E. coli</i>        | 94.9%       | 100%          | 66.3%        |
| <i>H. influenzae</i>  | 100%        | 95.9%         | 68.6%        |
| <i>K. pneumoniae</i>  | 39.1%       | 15.0%         | 7.4%         |
| <i>M. catarrhalis</i> | 45.5%       | 50.8%         | 2.3%         |
| <i>P. aeruginosa</i>  | 1.4%        | 1.4%          | 1.9%         |
| <i>S. aureus</i>      | 35.0%       | 19.1%         | 12.4%        |
| <i>S. agalactiae</i>  | 8.2%        | 8.2%          | 2.7%         |
| <i>S. pneumoniae</i>  | 64.3%       | 64.6%         | 25.2%        |
| <i>S. pyogenes</i>    | 1.1%        | 4.4%          | 4.7%         |

**Supplemental Table 3.** Estimated etiologies by condition. Conditions in which none of our species of interest are causative agents are excluded. If two numbers are shown, the number to the left was applied to children under 5 years old, and the number to the right was applied to individuals over 5. Diagnoses with etiology specified by ICD-9CM code (e.g. 481: pneumococcal pneumonia) were attributed to the appropriate organism.

| Species               | Cellulitis<br>(13) | Pharyngitis<br>(non-strep)<br>(14) | Pneumonia<br>(15, 16) | Sinusitis<br>(acute)<br>(17) | Sinusitis<br>(chronic)<br>(18) | Strep<br>throat | Otitis media<br>(suppurative)<br>(19, 20) | UTI<br>(21, 22) |
|-----------------------|--------------------|------------------------------------|-----------------------|------------------------------|--------------------------------|-----------------|-------------------------------------------|-----------------|
| <i>E. coli</i>        | -                  | -                                  | -                     | -                            | 2.9%                           | -               | -                                         | 75%   78.5%     |
| <i>H. influenzae</i>  | -                  | -                                  | -   0.6%              | 0.7%                         | 4.4%                           | -               | 23%   26%                                 | -               |
| <i>K. pneumoniae</i>  | -                  | -                                  | -                     | -                            | 2.9%                           | -               | -                                         | 4.7%   4.8%     |
| <i>M. catarrhalis</i> | -                  | -                                  | -                     | 0.1%                         | 11.8%                          | -               | 14%   3%                                  | -               |
| <i>P. aeruginosa</i>  | -                  | -                                  | -   0.4%              | -                            | -                              | -               | -                                         | 2.3%   2.7%     |
| <i>S. aureus</i>      | 8%                 | -                                  | -   1.6%              | 0.1%                         | 11.8%                          | -               | 1%   3%                                   | -               |
| <i>S. agalactiae</i>  | -                  | -                                  | -                     | -                            | 5.9%                           | -               | -                                         | -               |
| <i>S. pneumoniae</i>  | -                  | -                                  | 27%   5.1%            | 0.8%                         | 5.9%                           | -               | 35%   21%                                 | -               |
| <i>S. pyogenes</i>    | 4.3%               | -                                  | -   0.3%              | -                            | 7.4%                           | 100%            | 3%   3%                                   | -               |

## References

1. Bäckhed F, et al. (2015) Dynamics and Stabilization of the Human Gut Microbiome during the First Year of Life. *Cell Host Microbe* 17(5):690–703.
2. Bogaert D, et al. (2011) Variability and diversity of nasopharyngeal microbiota in children: a metagenomic analysis. *PLoS One* 6(2):e17035.
3. Mainous AG 3rd, Hueston WJ, Everett CJ, Diaz VA (2006) Nasal carriage of *Staphylococcus aureus* and methicillin-resistant *S. aureus* in the United States, 2001-2002. *Ann Fam Med* 4(2):132–137.
4. Regev-Yochay G, et al. (2004) Association between carriage of *Streptococcus pneumoniae* and *Staphylococcus aureus* in Children. *JAMA* 292(6):716–720.
5. Verhaegh SJC, et al. (2010) Determinants of *Moraxella catarrhalis* colonization in healthy Dutch children during the first 14 months of life. *Clin Microbiol Infect* 16(7):992–997.
6. Pettigrew MM, et al. (2012) Upper respiratory tract microbial communities, acute otitis media pathogens, and antibiotic use in healthy and sick children. *Appl Environ Microbiol* 78(17):6262–6270.
7. Lif Holgerson P, Holgerson PL, Öhman C, Rönnlund A, Johansson I (2015) Maturation of Oral Microbiota in Children with or without Dental Caries. *PLoS One* 10(5):e0128534.

8. Yassour M, et al. (2016) Natural history of the infant gut microbiome and impact of antibiotic treatment on bacterial strain diversity and stability. *Sci Transl Med* 8(343):343ra81.
9. Ginsburg CM, et al. (1985) Seroepidemiology of the group-A streptococcal carriage state in a private pediatric practice. *Am J Dis Child* 139(6):614–617.
10. Gunnarsson RK, Holm SE, Söderström M (1997) The prevalence of beta-haemolytic streptococci in throat specimens from healthy children and adults. Implications for the clinical value of throat cultures. *Scand J Prim Health Care* 15(3):149–155.
11. Hammitt LL, et al. (2006) Indirect effect of conjugate vaccine on adult carriage of *Streptococcus pneumoniae*: an explanation of trends in invasive pneumococcal disease. *J Infect Dis* 193(11):1487–1494.
12. Huang SS, et al. (2009) Continued Impact of Pneumococcal Conjugate Vaccine on Carriage in Young Children. *Pediatrics* 124(1):e1–e11.
13. Chira S, Miller LG (2010) *Staphylococcus aureus* is the most common identified cause of cellulitis: a systematic review. *Epidemiol Infect* 138(3):313–317.
14. Huovinen P, et al. (1989) Pharyngitis in adults: the presence and coexistence of viruses and bacterial organisms. *Ann Intern Med* 110(8):612–616.
15. Jain, Seema Self, Wesley H. Wunderink, Richard G. Fakhran, Sherene Balk, Robert Bramley, Anna M. Reed, Carrie Grijalva, Carlos G. Anderson, Evan J. Courtney, Mark Chappell, James D. Qi, Chao (2015) Community-Acquired Pneumonia Requiring Hospitalization among U.S. Adults. *N Engl J Med* 373:415–427.
16. Wubbel L, et al. (1999) Etiology and treatment of community-acquired pneumonia in ambulatory children. *Pediatr Infect Dis J* 18(2):98–104.
17. Gwaltney JM Jr, Scheld WM, Sande MA, Sydnor A (1992) The microbial etiology and antimicrobial therapy of adults with acute community-acquired sinusitis: a fifteen-year experience at the University of Virginia and review of other selected studies. *J Allergy Clin Immunol* 90(3 Pt 2):457–61; discussion 462.
18. Brook I, Thompson DH, Frazier EH (1994) Microbiology and management of chronic maxillary sinusitis. *Arch Otolaryngol Head Neck Surg* 120(12):1317–1320.
19. Celin SE, Bluestone CD, Stephenson J, Yilmaz HM, Collins JJ (1991) Bacteriology of acute otitis media in adults. *JAMA* 266(16):2249–2252.
20. Bluestone CD, Stephenson JS, Martin LM (1992) Ten-year review of otitis media pathogens. *Pediatr Infect Dis J* 11(Supplement):S7–11.
21. Edlin RS, Shapiro DJ, Hersh AL, Copp HL (2013) Antibiotic Resistance Patterns of Outpatient Pediatric Urinary Tract Infections. *J Urol* 190(1):222–227.
22. Gupta K, Scholes D, Stamm WE (1999) Increasing prevalence of antimicrobial resistance among uropathogens causing acute uncomplicated cystitis in women. *JAMA* 281(8):736–738.
